# Supplementary material for: Improving the catalytic efficiency and stereoselectivity of a nitrilase from Synechocystis sp. PCC6803 by semi-rational engineering en route to chiral γ-amino acids
Source: Royal Society of Chemistry journal article supplement (doi:10.1039/c8cy02455c), 2019-01-01

## Supporting Information

### Improving catalytic efficiency and stereoselectivity of a nitrilase from *Synechocystis* sp. PCC6803 by semi-rational engineering en route to chiral $\gamma$ -amino acids

Shanshan Yu,<sup>a†</sup> Peiyuan Yao,<sup>a†</sup> Jinlong Li,<sup>a</sup> Jinhui Feng,<sup>a</sup> Qiaqing Wu,<sup>a\*</sup> and Dunming Zhu<sup>a\*</sup>

<sup>a</sup>National Engineering Laboratory for Industrial Enzymes, Tianjin Engineering Research Center of Biocatalytic Technology, Tianjin Institute of Industrial Biotechnology, Chinese Academy of Sciences, 32 Xi Qi Dao, Tianjin Airport Economic Area, Tianjin 300308, People's Republic of China. Email: zhu\_dm@tib.cas.cn; wu\_qq@tib.cas.cn

† These authors contributed equally.

### Primers used in the mutation experiments

**Table S1** Oligonucleotides used for mutagenesis

| Primers                      | Sequence (5'→3')                                   |
|------------------------------|----------------------------------------------------|
| P1                           | GGTCAT <b>CATATG</b> CTGAATTATACAAAAAATATTCG       |
| Y59A                         | CAAAGGAAAAATAAGG <b>TGC</b> CATAAGGCACAAAAGTTTCAGG |
| F64A                         | CAAACCGGCGGTTCAACT <b>TGC</b> GGAAAAATAAG          |
| T139A                        | GTTCATGGTA <b>TGC</b> GGGCGTGATTTTG                |
| Y140A                        | CGTTCATG <b>TGC</b> GGTGGGCGTGATTTTG               |
| H141A                        | CCAAACCATCCGTTCT <b>TGC</b> GTAGGTGG               |
| E142A                        | CCAAACCATCCG <b>TGC</b> ATGGTAGGTGG                |
| W170A                        | GGATTGTAATGTTCT <b>TGC</b> ACAGGCCAAGGCTCC         |
| F193A                        | CATCGATCCGGG <b>TGC</b> TTGCCACAGTGG               |
| P194A                        | CACCATCGATCCG <b>TGC</b> AATTGCCACAG               |
| M197A                        | GAAAATCTGACCCACT <b>TGC</b> CGATCCGGGGAATTG        |
| V198A                        | CGAAAATCTGACCT <b>TGC</b> CATCGATCCGG              |
| I201A                        | CGAAAATCTGACCT <b>TGC</b> CATCGATCCGG              |
| F202A                        | CCATTTGATCCGCT <b>TGC</b> AATCTGACCCACC            |
| Q205A                        | GATCCGCGAA <b>TGC</b> CTGACCCACCATC                |
| Saturation mutagenesis sites |                                                    |
| H141                         | CCAAACCATCCGTTCA <b>HN</b> GTAGGTGGGCGTGATTTTGC    |
| P194                         | GACCCACCATCGATCCA <b>HN</b> GAATTGCCACAGTGG        |
| M197                         | GAAAATCTGACCCACA <b>HN</b> CGATCCGGGGAATTGC        |
| I201                         | CATTTGATCCGCGAAA <b>HN</b> CTGACCCACCATCG          |
| F202                         | CCATTTGATCCGCA <b>HN</b> AATCTGACCCACC             |

## Alanine scanning

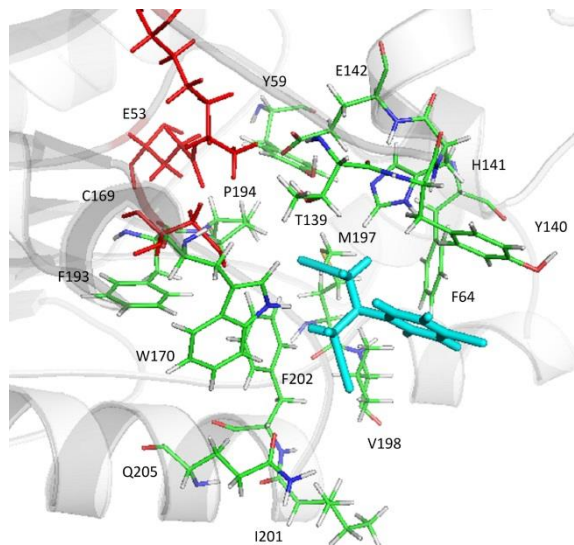

**Figure S1** Modeling **1a** (cyan) into the active site of the wt *SsNIT* by Discovery Studio 4.1 that highlights fourteen amino acid residues with carbon atoms in green located within a distance of 5 Å of **1a** as targets for alanine scanning. The catalytic residues, E53, K135, and C169, are represented by red.

### The reaction of alanine scanning,

To a 1 mL reaction, **1a** (10 mM) and whole cells ( $OD_{600}=5$ ) were added to phosphoric acid (100 mM, pH 7.0). The reaction mixture was incubated at 30°C with 200 rpm for 30 min, and then quenched with 20  $\mu$ L of 6 M HCl solution. 1 mL of ethyl acetate was added to the mixture and organic phases were dried with anhydrous sodium sulfate for HPLC analysis.

## Protein expression of WT and mutants

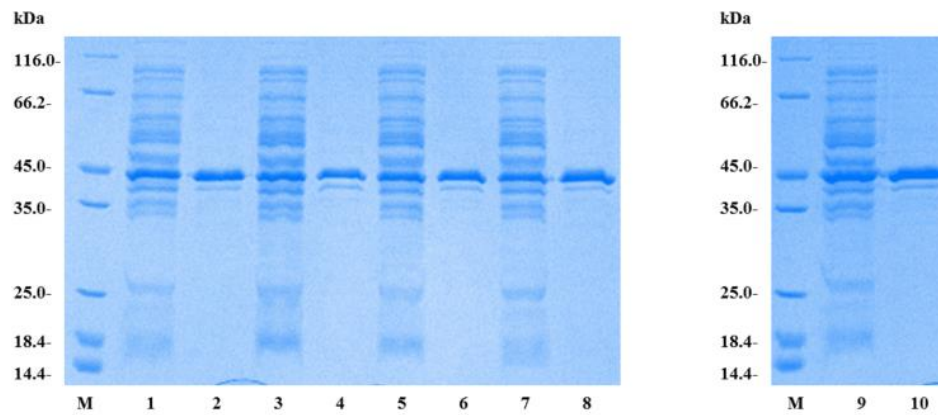

**Figure S2** SDS-PAGE analysis of the recombinant nitrilase. M: protein standard marker; Lane 1: supernatant of wt SsNIT; Lane 2: precipitate of wt SsNIT; Lane 3: supernatant of P194A; Lane 4: precipitate of P194A; Lane 5: supernatant of F202V; Lane 6: precipitate of F202V; Lane 7: supernatant of P194A/F202V; Lane 8: precipitate of P194A/F202V; Lane 9: supernatant of P194A/I201A/F202V; Lane 10: precipitate of P194A/I201A/F202V;

**Chiral HPLC analysis,  $^1\text{H}$ -NMR and  $^{13}\text{C}$ -NMR of product ((*S*)-**2a**) catalyzed by whole cells of variant P194A/I201A/F202V**

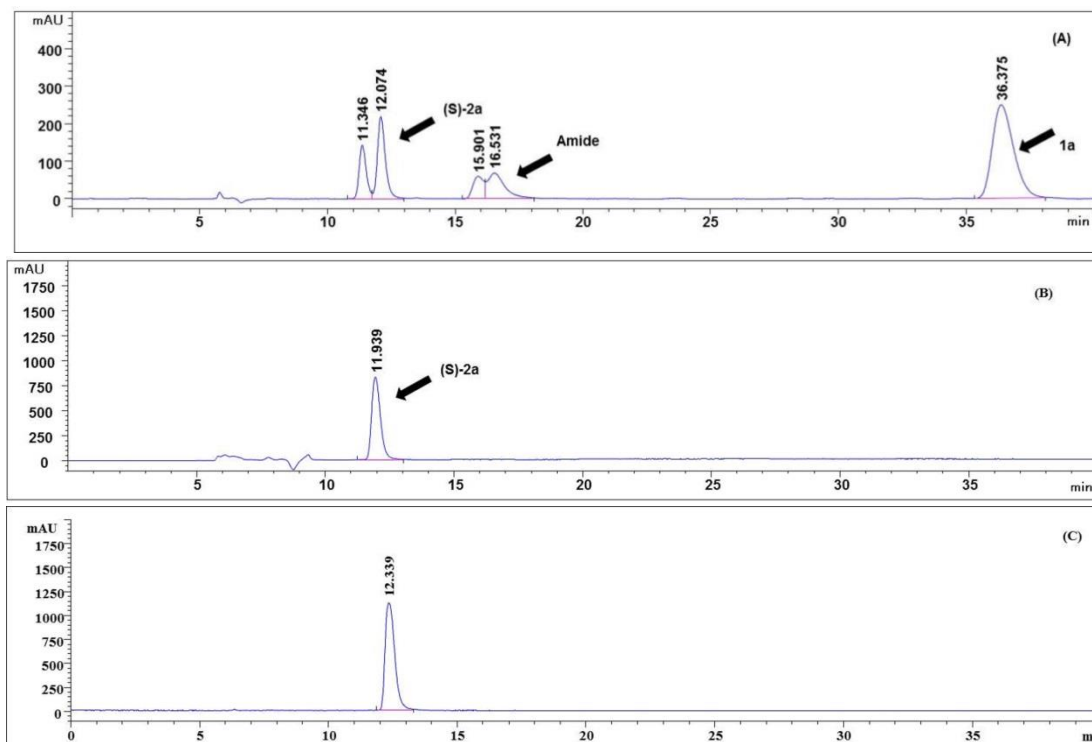

**Figure S3.** HPLC traces of the mixture of the standards of rac-3-(4-chlorophenyl)-4-cyanobutanoic acid (**2a**), rac-amide and 3-(4-chlorophenyl) glutaronitrile (**1a**) (A), the product ((*S*)-**2a**) catalyzed by whole cells of *Bj*NIT6402 from *Bradyrhizobium japonicum* USDA110 (B), and product ((*S*)-**2a**) catalyzed by whole cells of variant P194A/I201A/F202V (C).

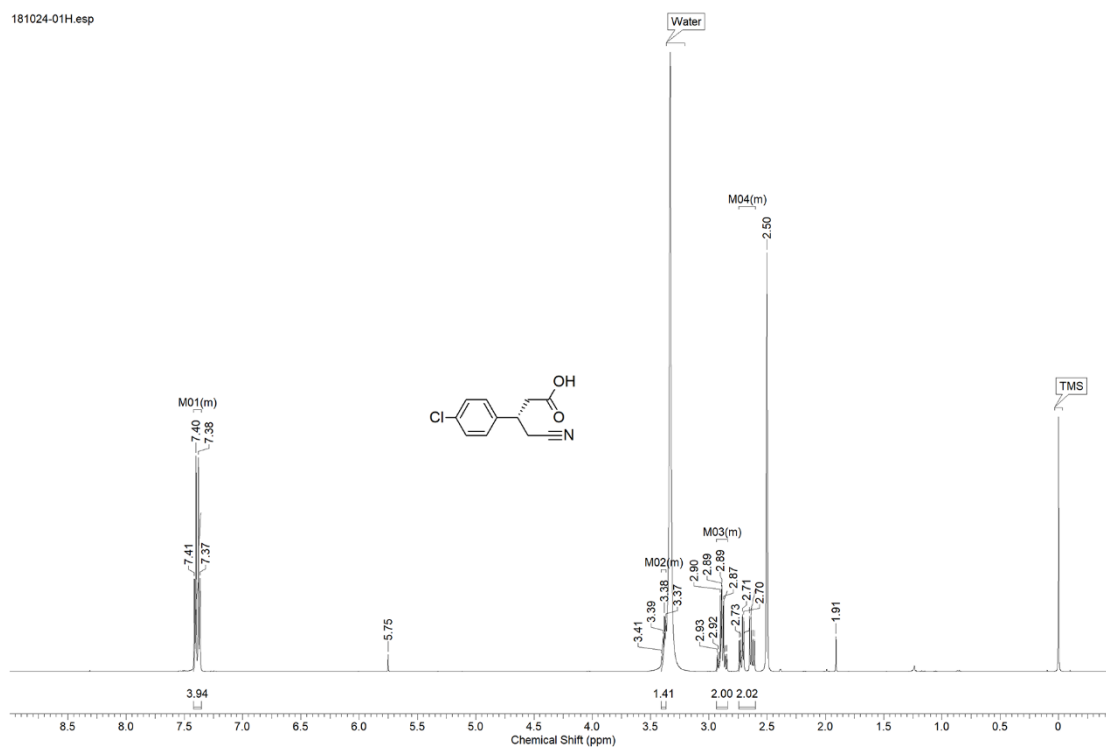

**Figure S4**  $^1\text{H-NMR}$  of product ((*S*)-**2a**) catalyzed by whole cells of variant P194A/I201A/F202V.

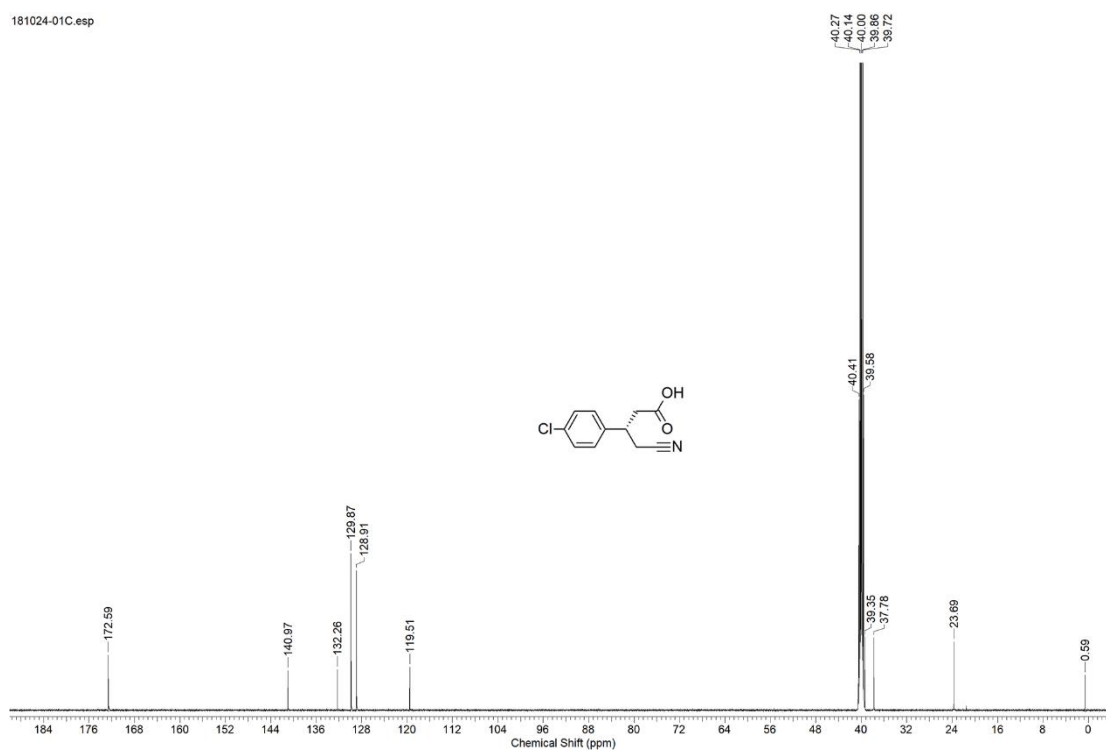

**Figure S5**  $^{13}\text{C-NMR}$  of product ((*S*)-**2a**) catalyzed by whole cells of variant P194A/I201A/F202V.

## Analytical reaction of other 3-substituted glutaronitriles **1b-n** catalyzed by whole cells of wt *SsNIT* and its mutant P194A/I201A/F202V

All the samples were detected using HPLC with a UV detector at the wavelength of 210 nm by a CHIRALPAK OD-H column (5  $\mu\text{m}$ , 4.6 mm  $\times$  250 mm) and isocratically eluted at 30°C. The flow rate was 0.5 mL/min. The eluent of isopropanol-hexane-trifluoroacetic acid was 30:70:0.1 (v/v/v), except that **1f** and **2f** were 10:90:0.1 (v/v/v) for 30 min and then 40:60:0.1 (v/v/v) for 50 min .

### (1) The reaction of **1b**

#### Standard sample of **1b**

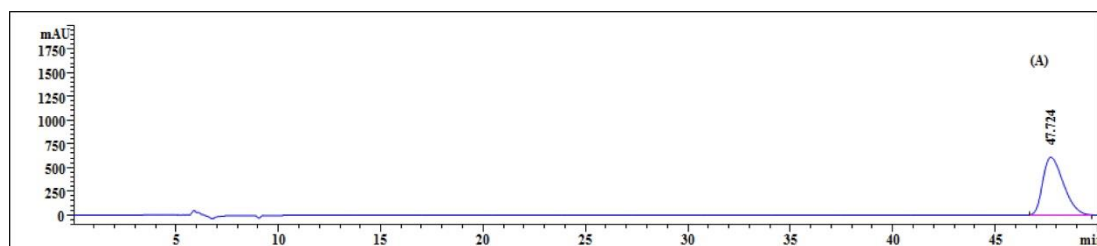

#### Racemate of **2b**

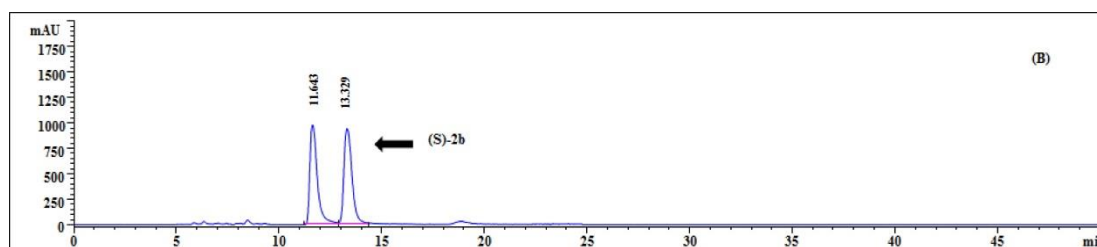

#### Sample of **2b** with wt *SsNIT*

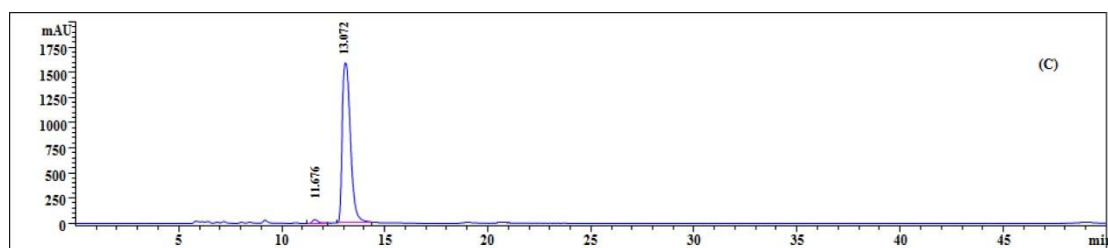

#### Sample of **2b** with P194A/I201A/F202V

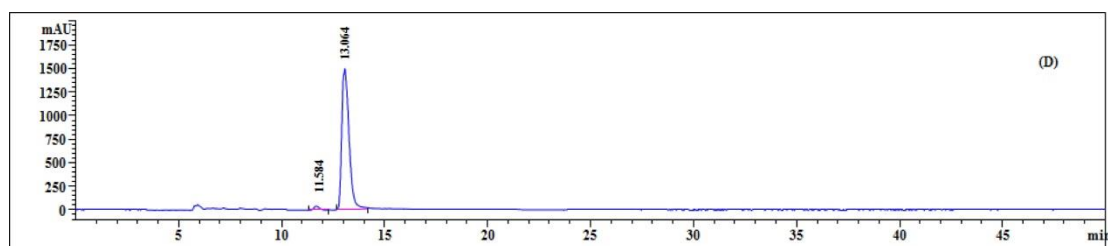

(2) The reaction of **1c**

Standard sample of **1c**

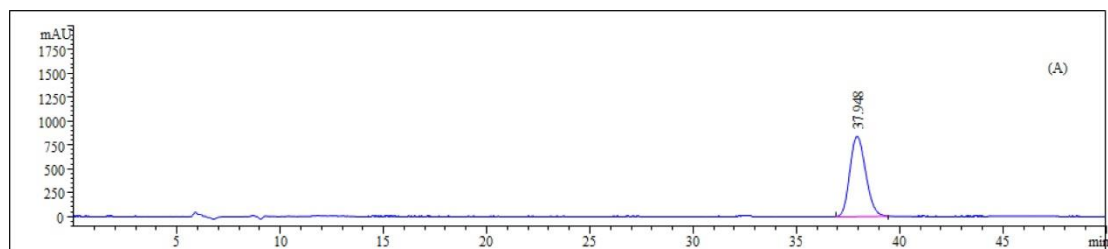

Racemate of **2c**

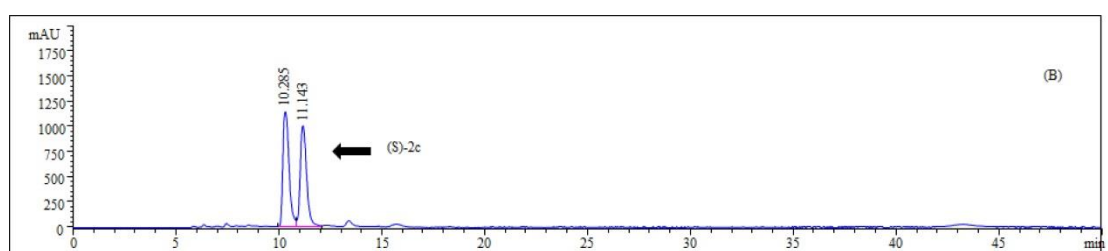

Sample of **2c** with wt *Ss*NIT

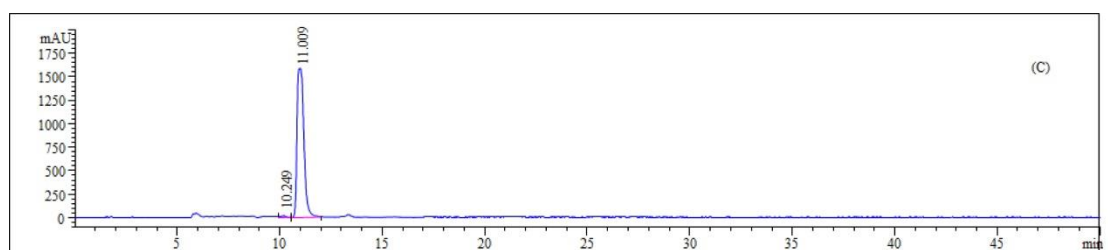

Sample of **2c** with P194A/I201A/F202V

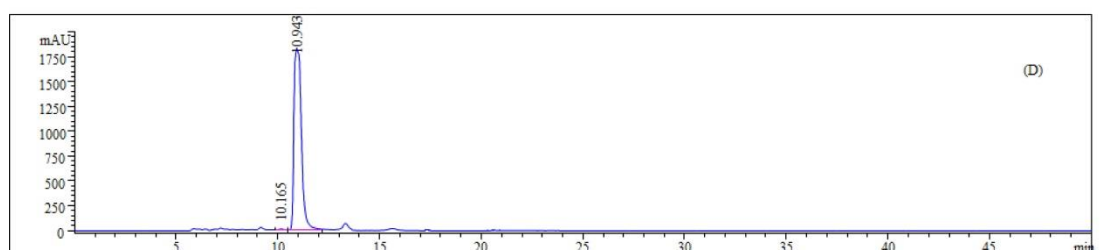

(3) The reaction of **1d**

Standard sample of **1d**

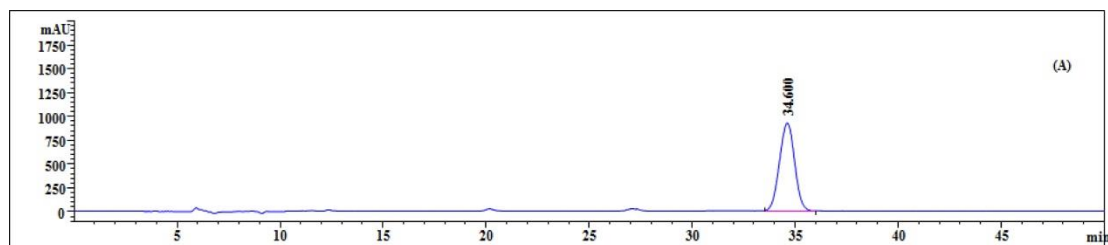

Racemate of **2d**

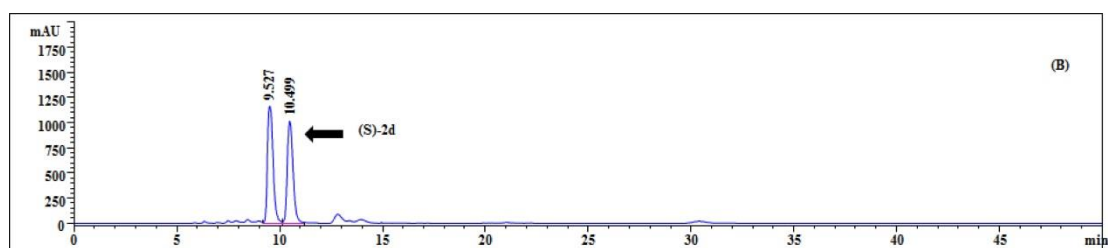

Sample of **2d** with wt SsNIT

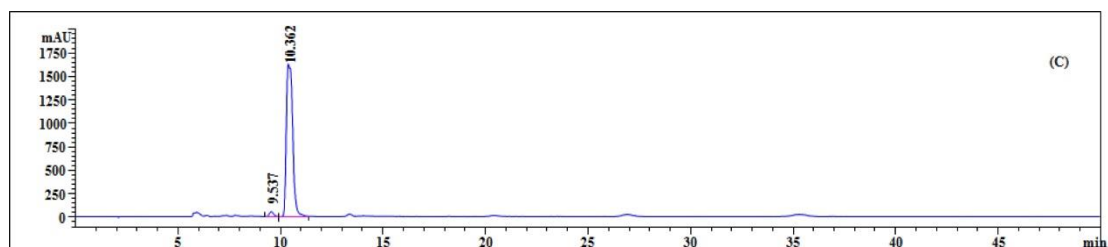

Sample of **2d** with P194A/I201A/F202V

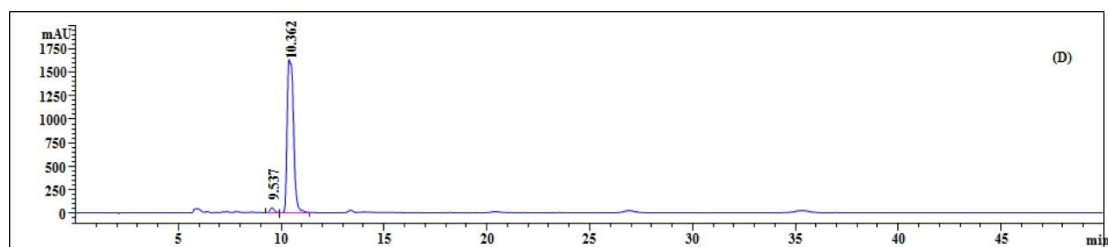



(4) The reaction of **1f**

Standard sample of **1f**

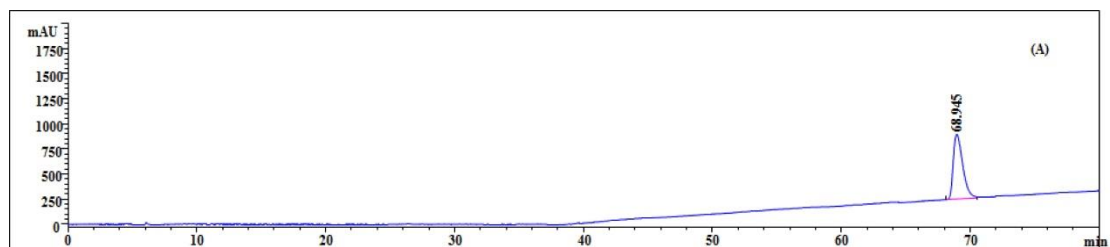

Racemate of **2f**

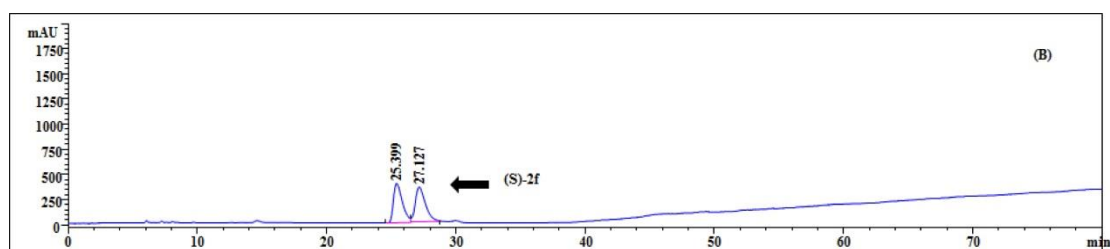

Sample of **2f** with wt SsNIT

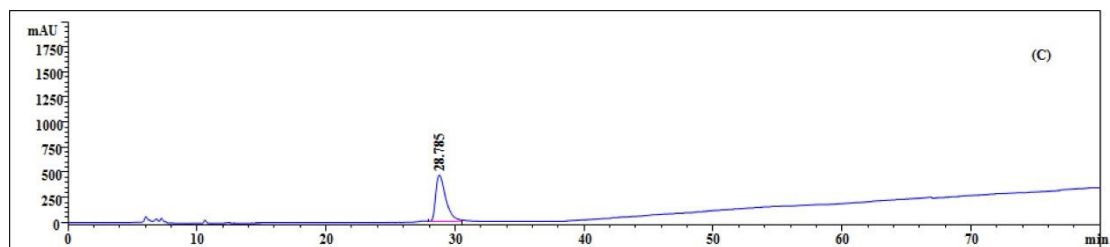

Sample of **2f** with P194A/I201A/F202V

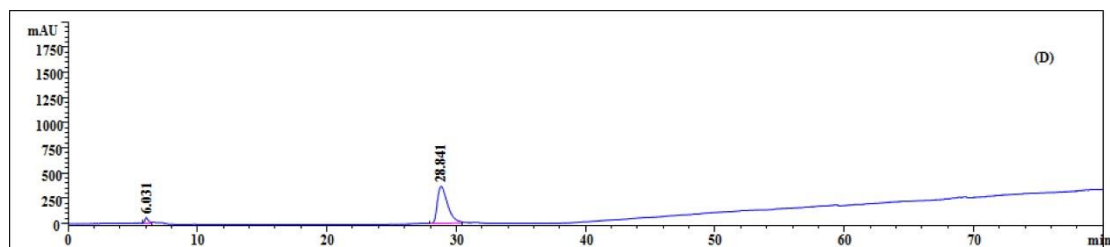

(5) The reaction of **1g**

Standard sample of **1g**

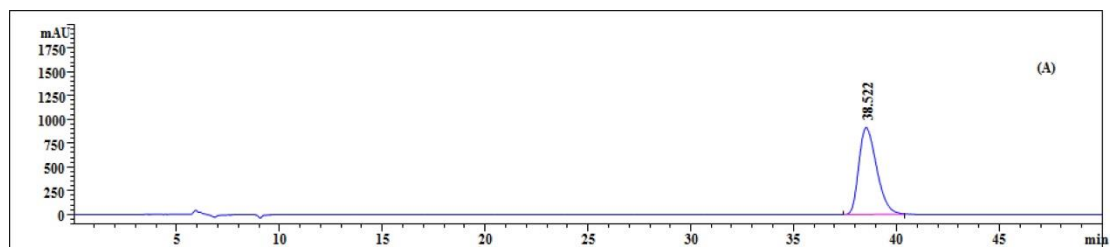

Racemate of **2g**

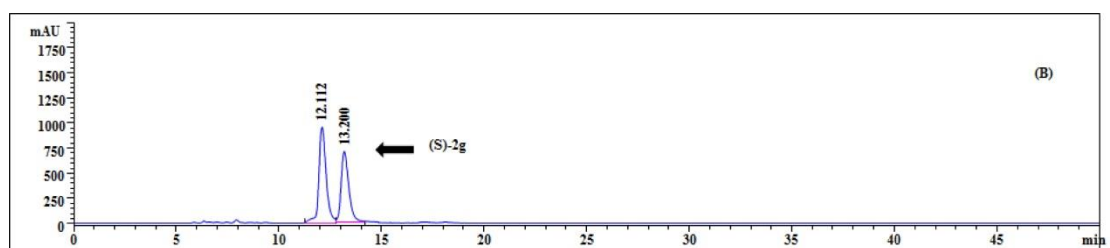

Sample of **2g** with wt SsNIT

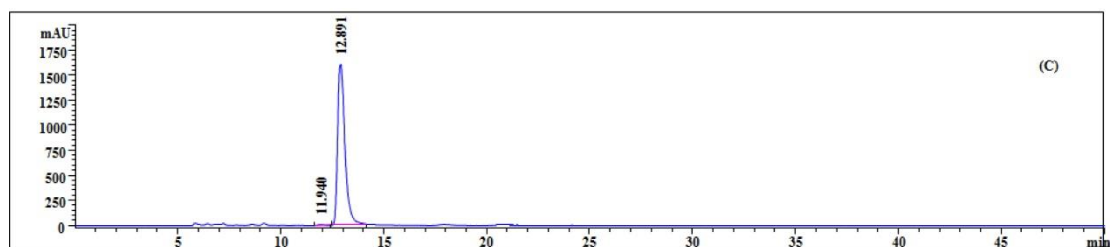

Sample of **2g** with P194A/I201A/F202V

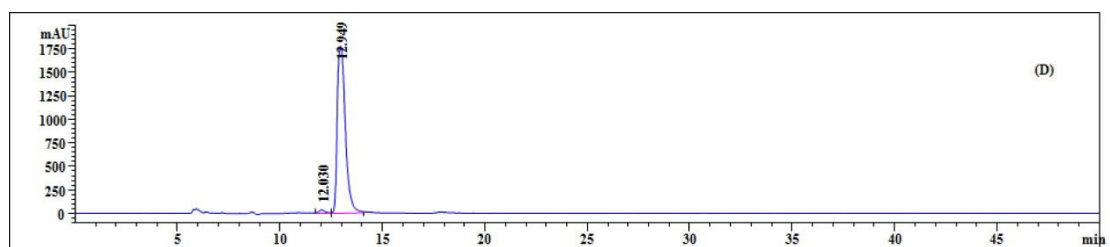

(6) The reaction of **1h**

Standard sample of **1h**

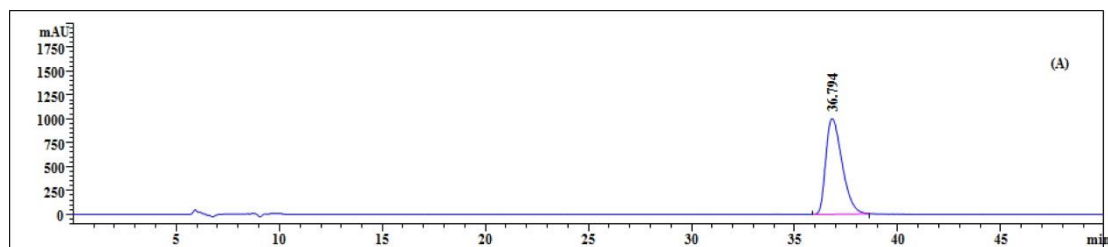

Racemate of **2h**

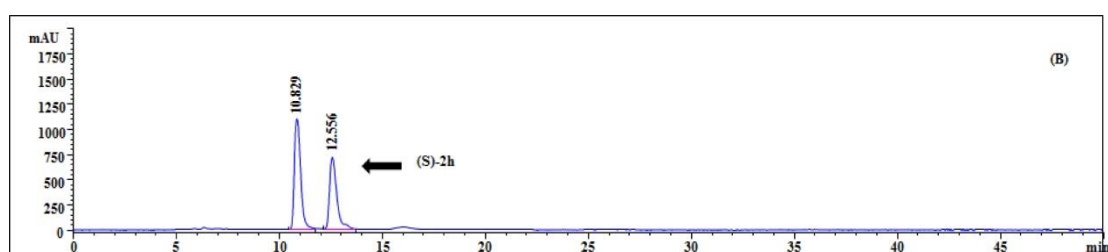

Sample of **2h** with wt SsNIT

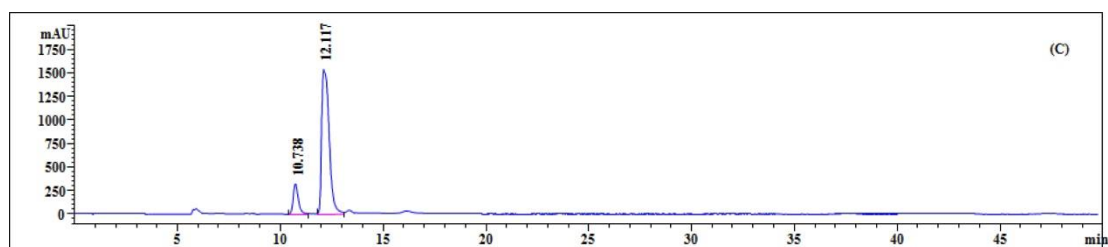

Sample of **2h** with P194A/I201A/F202V

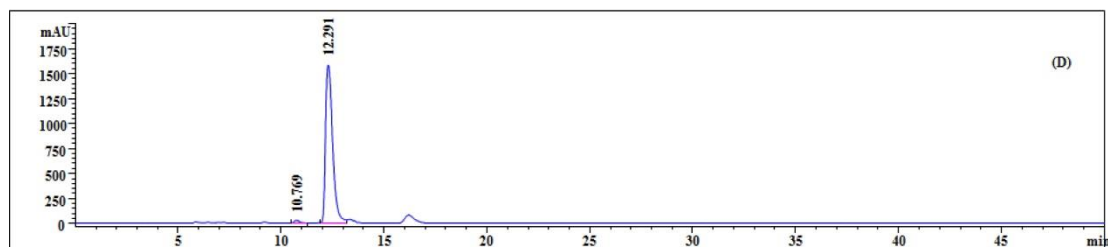

(7) The reaction of **1i**

Standard sample of **1i**

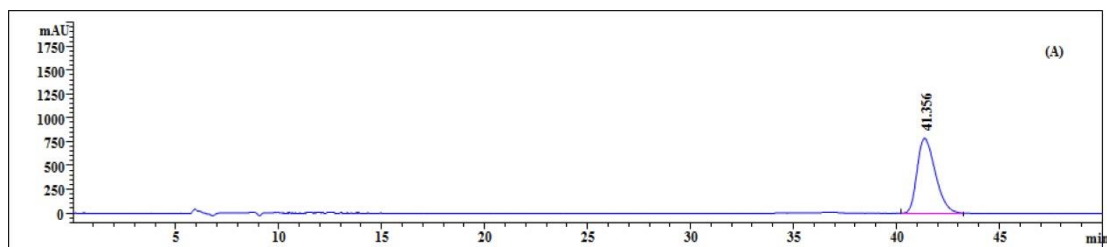

Racemate of **2i**

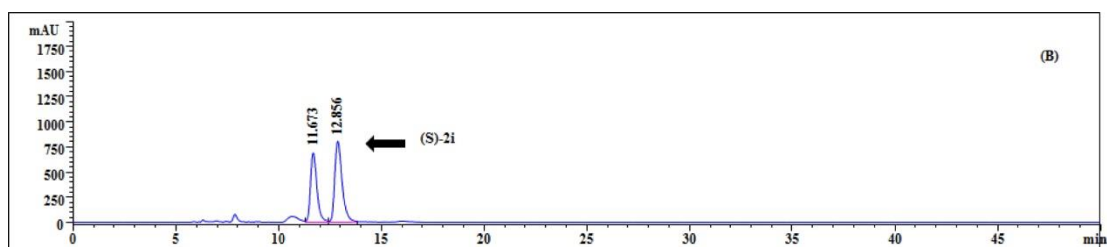

Sample of **2i** with wt SsNIT

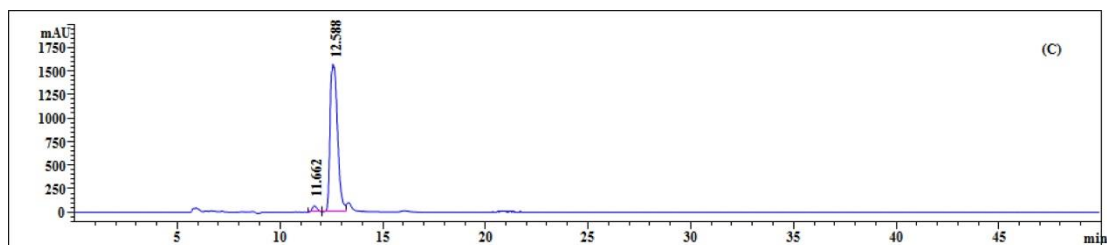

Sample of **2i** with P194A/I201A/F202V

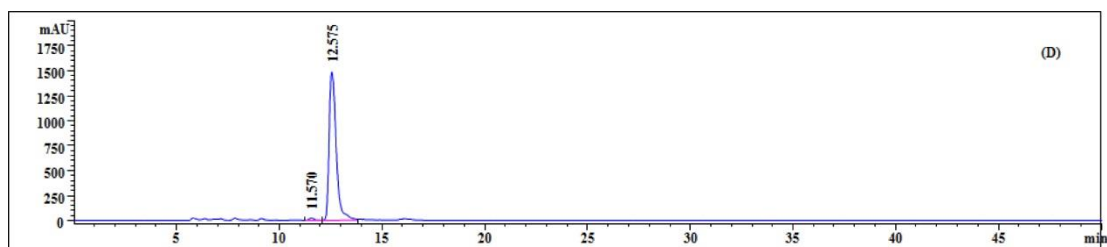

(8) the reaction of **1j**

Standard sample of **1j**

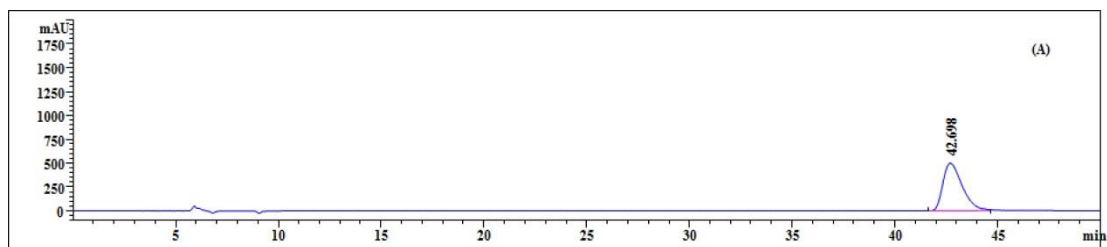

Racemate of **2j**

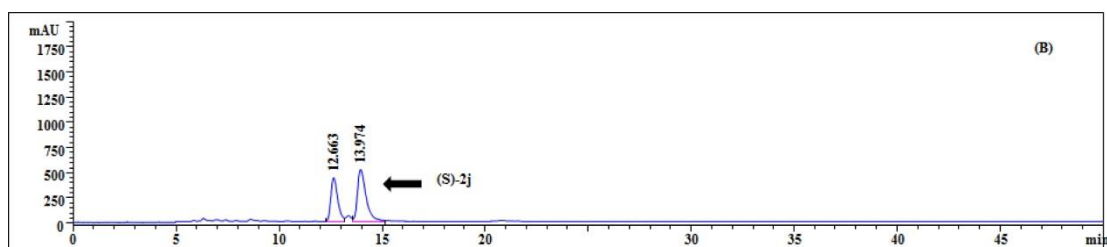

Sample of **2j** with wt SsNIT

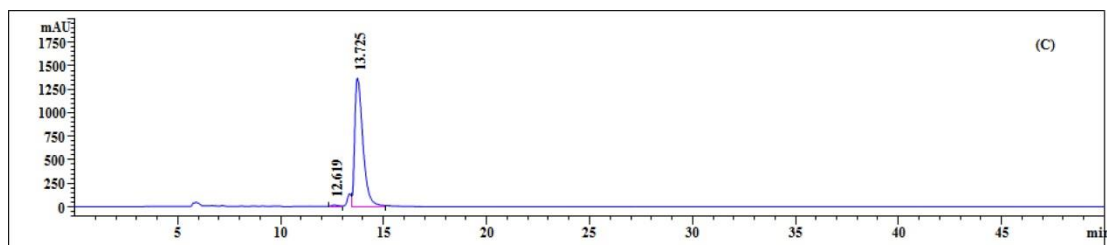

Sample of **2j** with P194A/I201A/F202V

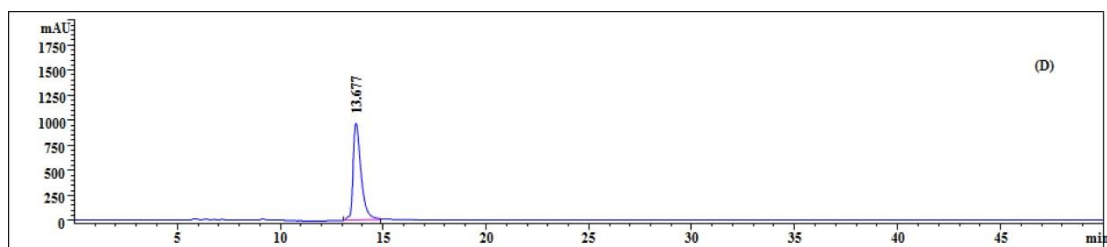

(9) The reaction of **1k**

Standard sample of **1k**

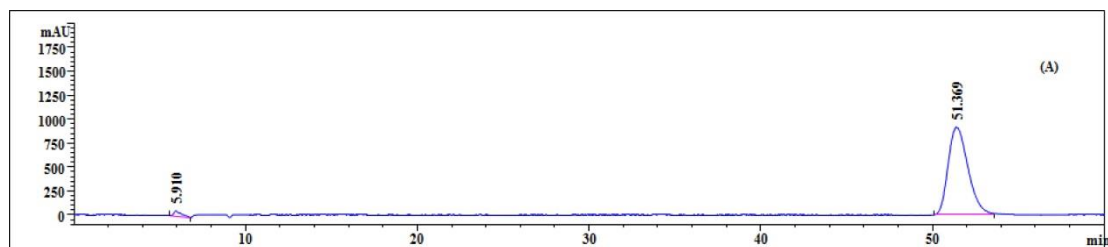

Racemate of **2k**

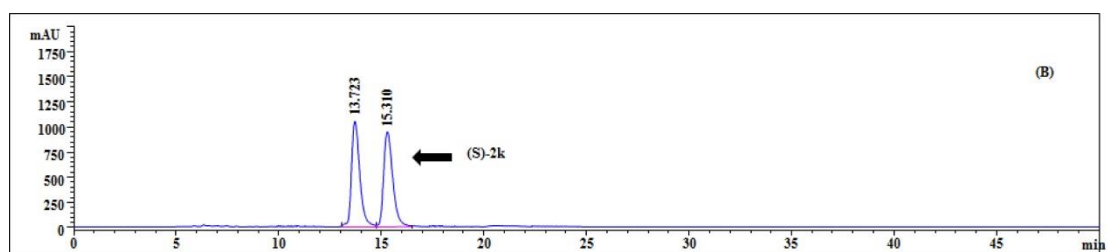

Sample of **2k** with wt SsNIT

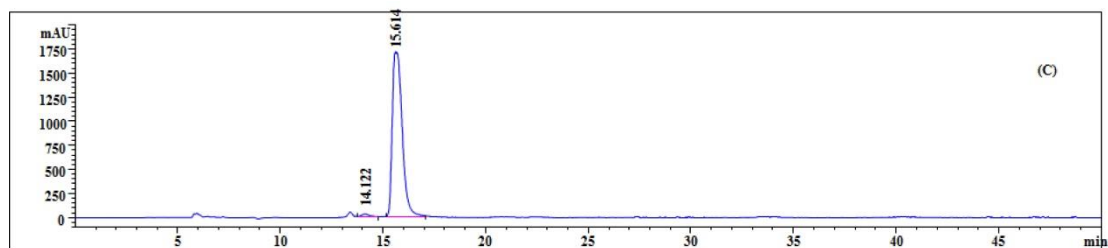

Sample of **2k** with P194A/I201A/F202V

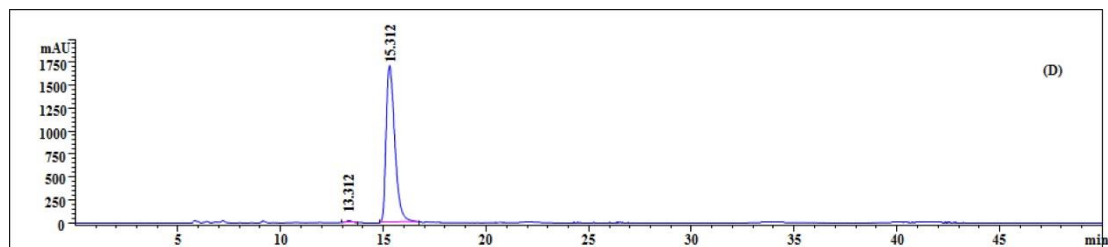

(10) The reaction of **1m**

Standard sample of **1m**

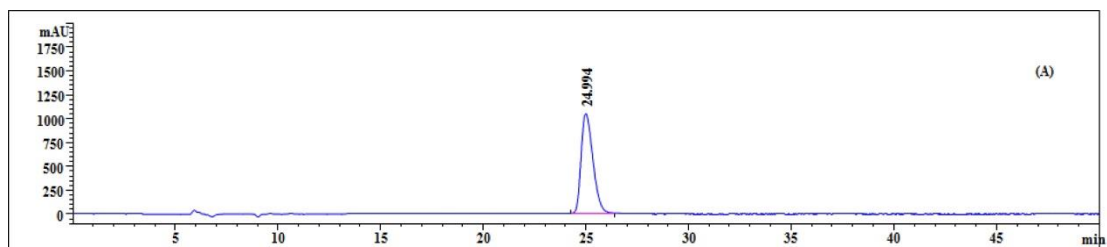

Racemate of **2m**

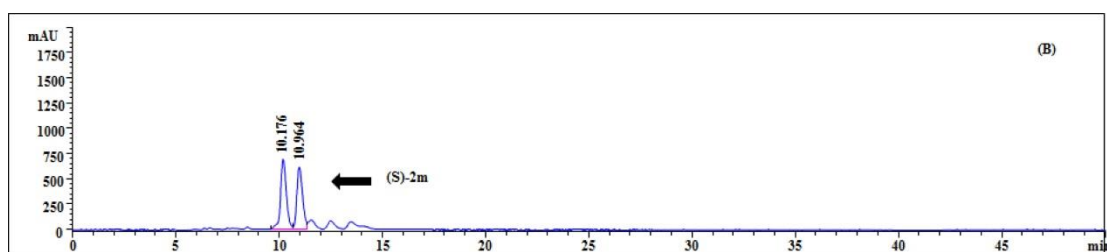

Sample of **2m** with wt SsNIT

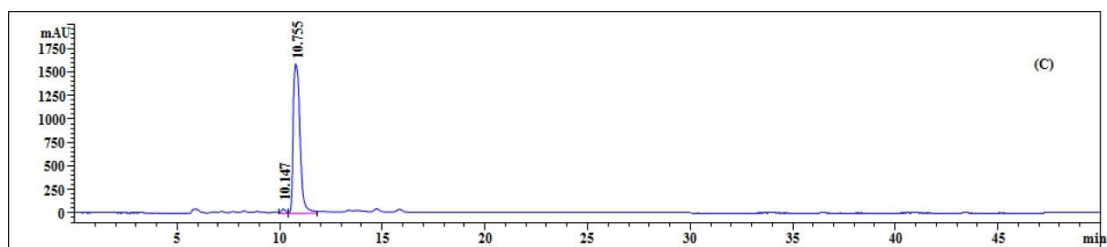

Sample of **2m** with P194A/I201A/F202V

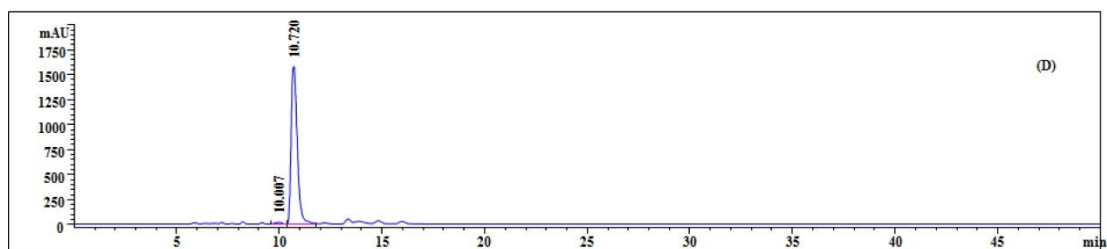

Supplement: c8cy02455c1.pdf [file c8cy02455c1.pdf]
